# Supplementary material
Source: publisher site journal article supplement (https://www.dovepress.com/article/452147)
Supplement: Supplementary file 1 [file get_supplementary_file.php]

|  | ***Bilateral Multifocal*** | | | ***Bilateral EDOF*** | | | ***Bilateral Rot. Asym*** | | |
| --- | --- | --- | --- | --- | --- | --- | --- | --- | --- |
| **Variable** | **Coef.** | **95% CI** | ***P*** | **Coef.** | **95% CI** | ***P*** | **Coef.** | **95% CI** | ***P*** |
| **Angle Kappa** | -0.085 | -0.60 to 0.43 | 0.75 | -0.24 | -0.21 to 0.23 | 0.319 | 0.36 | -0.64 to 1.35 | 0.48 |
| **Gender**  **Female**  **Male** | (ref)  0.072 | -  -0.093 to 0.24 | 0.39 | (ref)  0.19 | -  0.17 to 0.37 | -  0.032 | (ref)  -0.0012 | -  -0.32 to 0.32 | 0.99 |
| **Age (year)** | -2.2x10-5 | -5.310-6 to 1.0x10-6 | 0.18 | -5x10-5 | -8.910-5 to -1.8x10-5 | 0.003 | 2.7x10-5 | -3.9x10-5 to 9.3x10-5 | 0.41 |
| **Binocular UCDVA** | 1.47 | 0.19 to 2.76 | 0.025 | 2.01 | 0.88 to 3.13 | 0.001 | -0.29 | -3.35 to 2.76 | 0.85 |
| **Binocular UCNVA** | 0.042 | 0.28 to 1.80 | 0.91 | 0.35 | -0.39 to 1.08 | 0.35 | 1.25 | -0.089 to 2.57 | 0.067 |

**Table S1:** Linear regression model examining predictors of patient-reported satisfaction by lens model implanted. Bilateral multifocal patients received a Tecnis Multifocal +3.25 (J&J Vision, Santa Ana, CA) in each eye. Bilateral EDOF patients received a Tecnis Symfony or Symfony Toric (J&J Vision) in each eye. Bilateral Rotationally Asymmetric (Rot. Asym.) received a rotationally asymmetric refractive IOL in each eye (Oculentis B.V., Arnhem, The Netherlands). UCDVA = uncorrected distance visual acuity; UCNVA = uncorrected near visual acuity; Coef. = correlation coefficient; CI = Confidence interval
